# Supplementary material for: Strawberry Accessions with Reduced Drosophila suzukii Emergence From Fruits
Source: PubMed Central journal article supplement (PMC5174125; doi:10.3389/fpls.2016.01880), 2016-12-21
Supplement: Image_3.pdf [file Image_3.pdf]

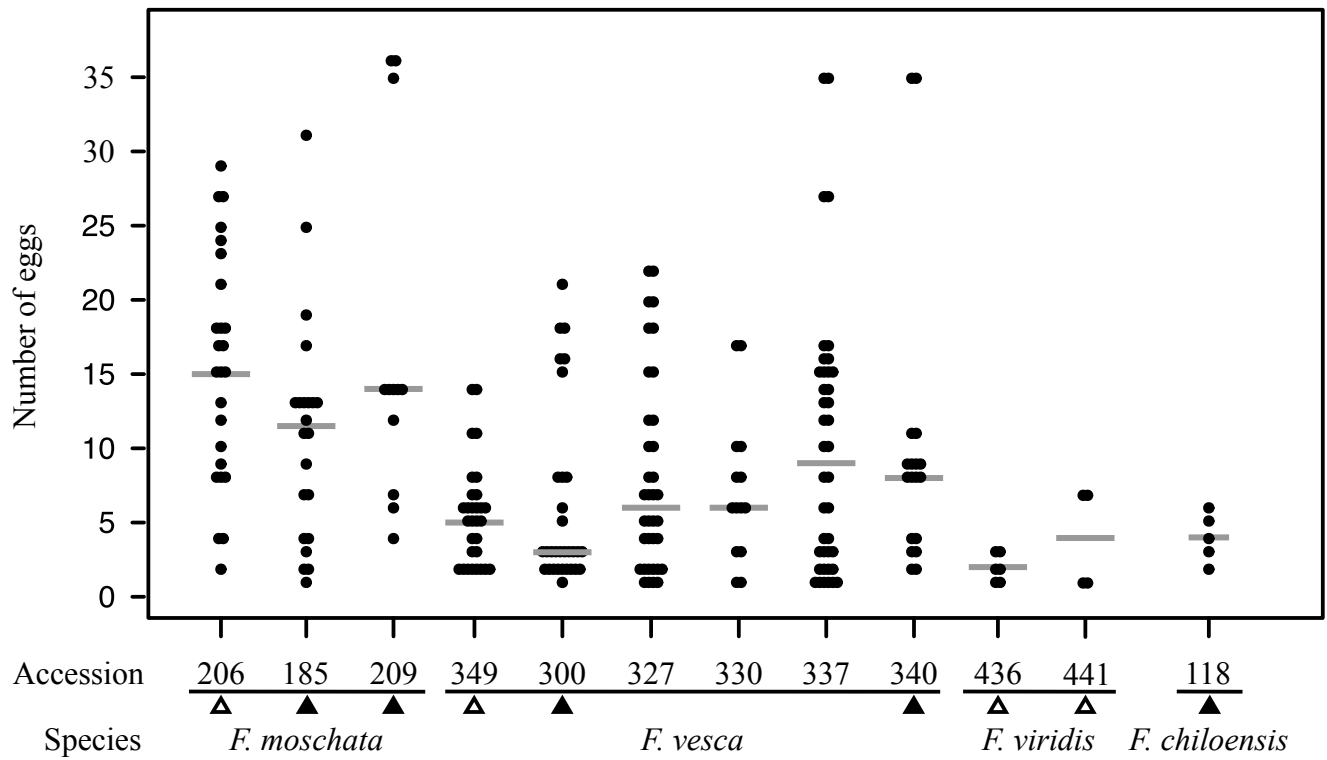

**Figure S3.** The number of eggs deposited into individual fruits of 12 *Fragaria* accessions tested in 2016. Open triangles, reference accessions that showed high fly emergence and emergence probability in 2015 and can be crossed with the candidate accessions of the same species. Closed triangles, candidate accessions identified from 2015. Black dots, number of eggs deposited into individual fruits of the accessions. Grey lines, median.
